# Supplementary material
Source: MDPI journal article supplement (https://www.mdpi.com/2071-1050/14/8/4383)
Supplement: s1 [file s1 › sustainability-1613569-supplementary.pdf]

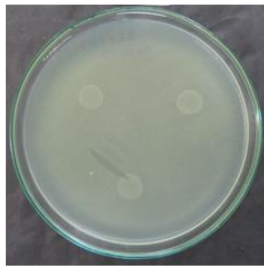

***P. putida* + *B. subtilis***

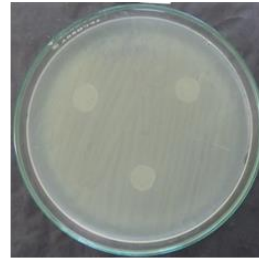

***B. subtilis* + *P. putida***

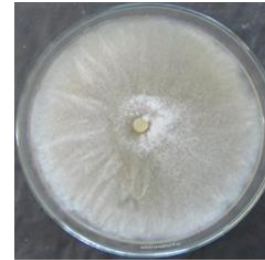

***T. erinaceum* + *P. putida***

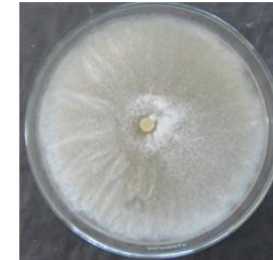

***T. erinaceum* + *B. subtilis***

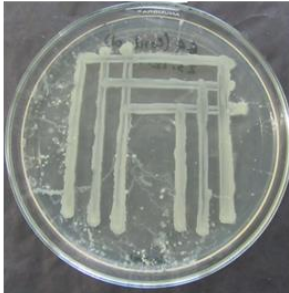

***P. putida***

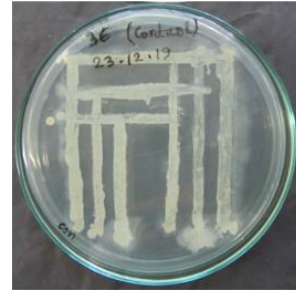

***B. subtilis***

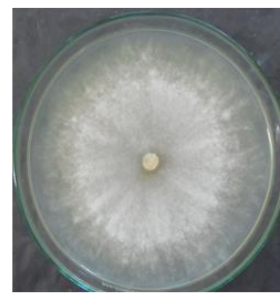

***T. erinaceum***

**Without Curzate M8**

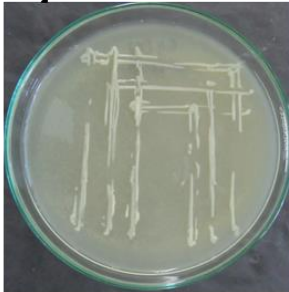

***P. putida***

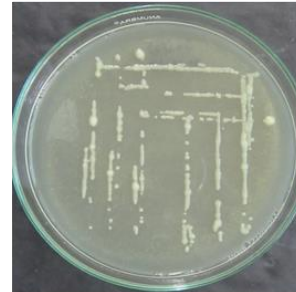

***B. subtilis***

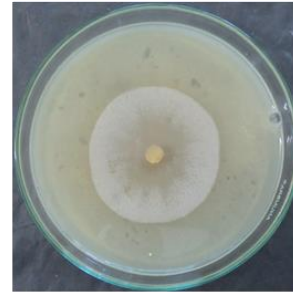

***T. erinaceum***

**With Curzate M8**

**Figure S1.** Interactions effect of bacterial and fungal bioagents with Curzate M8 used for controlling late blight of potato.

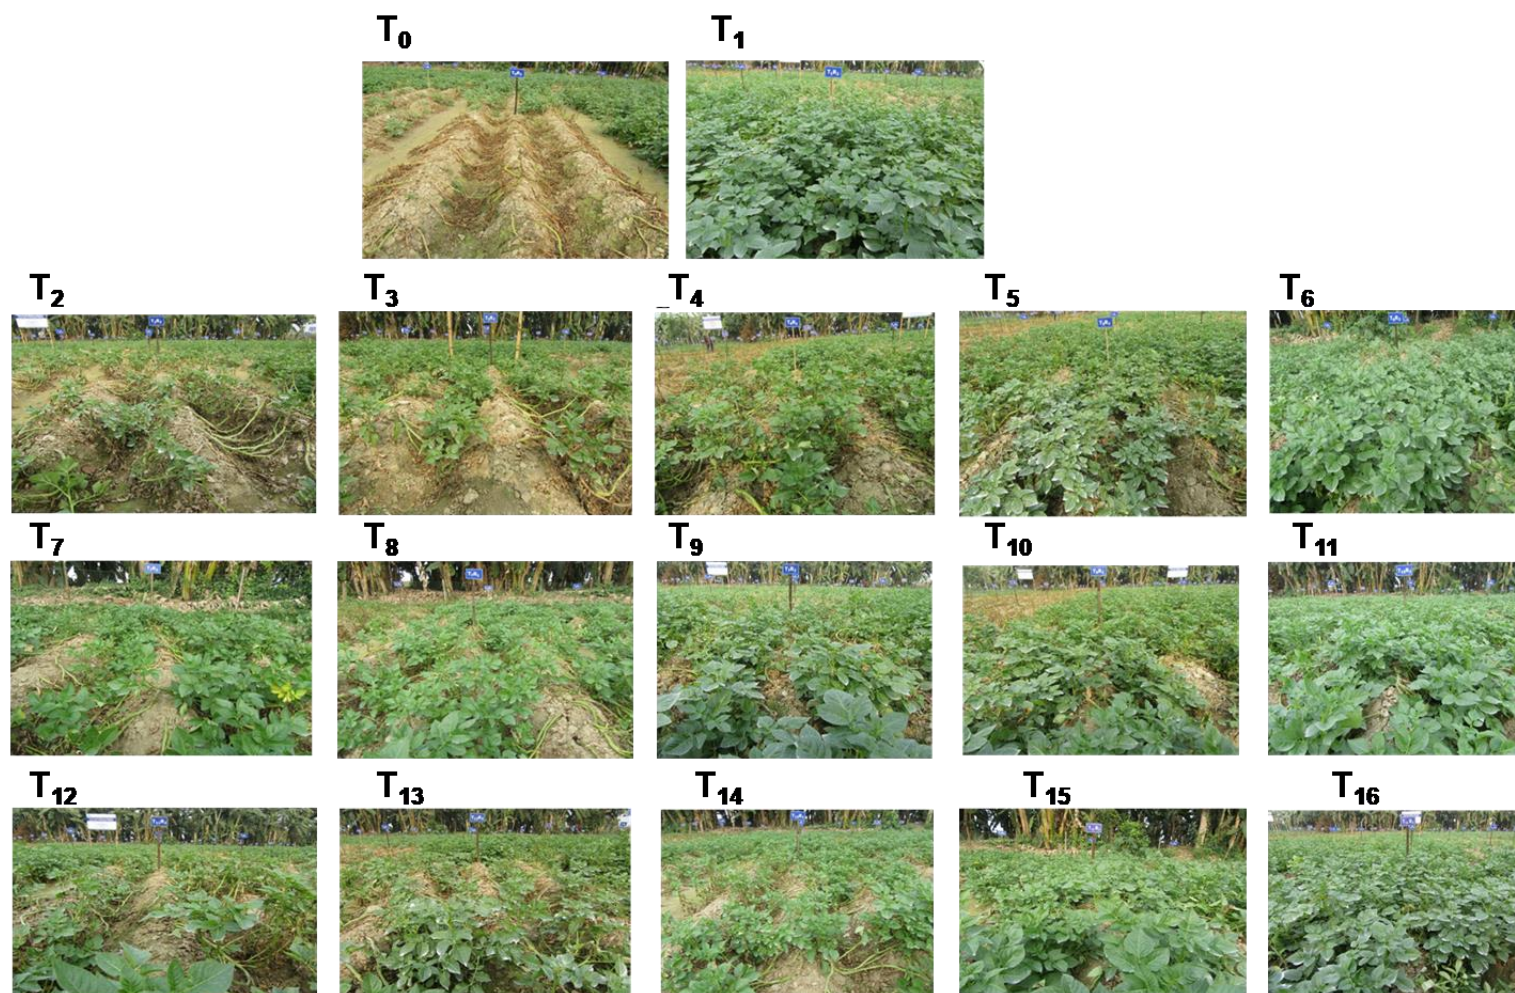

**Figure S2.** Efficacy of some selected bacterial and fungal bioagents in reducing the frequency of fungicides application for controlling late blight severity of potato under field condition.
